# Supplementary material
Source: HighWire-hosted journal article supplement (https://gut.bmj.com/content/66/5/761.1)
Supplement: inline-supplementary-material-1 [file inline-supplementary-material-1.pdf]

**Supplemental Figure 1. H. pylori infection induces TNF- $\alpha$  and IL-8 expression**

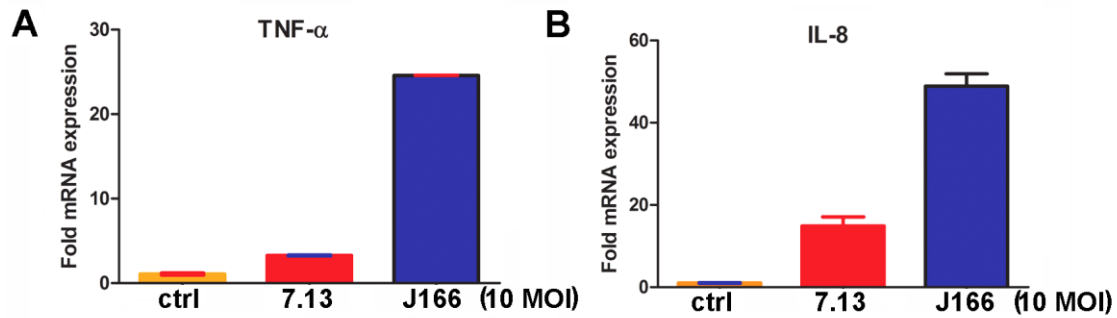

A-B) The qRT-PCR analysis of TNF- $\alpha$  and IL-8 was performed in AGS cells with H. pylori infection.

Supplemental figure 01, Zhu et al.

**Supplemental Figure 2. TNF- $\alpha$  activates NF- $\kappa$ B**

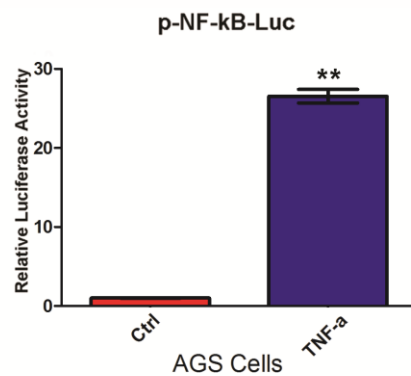

Luciferase reporter assay for p-NF- $\kappa$ B-luc in AGS cells with TNF- $\alpha$  treatment.

Supplemental figure 02, zhu et al.

Supplemental Figure 3. *H. pylori* infection regulates DARPP-32 promoter activity

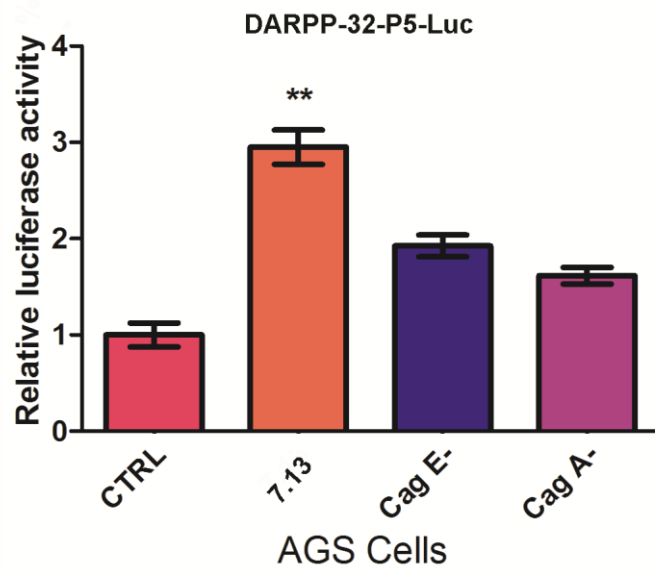

Luciferase reporter assay for DARPP-32-P5-luc in AGS cells co-cultured with *H. pylori* 7.13 strains (wildtype, cagA- and cagE- mutants).

Supplemental figure 03, zhu et al.

Supplemental Figure 4. TNF- $\alpha$  enhances NF- $\kappa$ B binding to DARPP-32 promoter

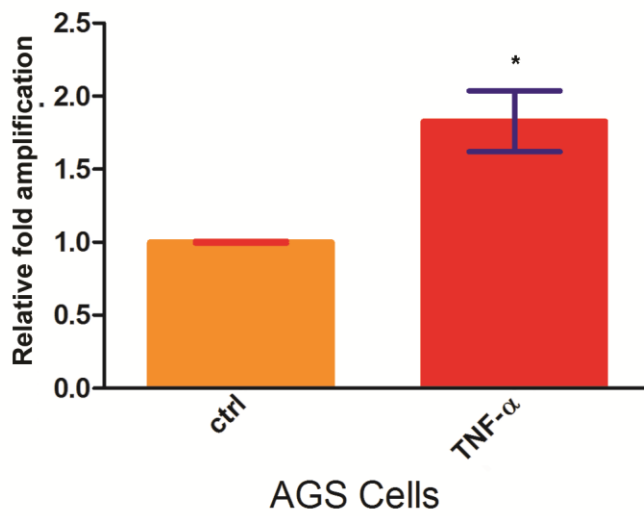

ChIP assay using a specific antibody against NF- $\kappa$ B-p65 for immunoprecipitation of formaldehyde-fixed chromatin in AGS cells with control or TNF- $\alpha$  treatment. qRT-PCR was performed using primers designed to amplify the NF- $\kappa$ B-p65 binding site on DARPP-32 promoter region.

Supplemental figure 04, zhu et al.

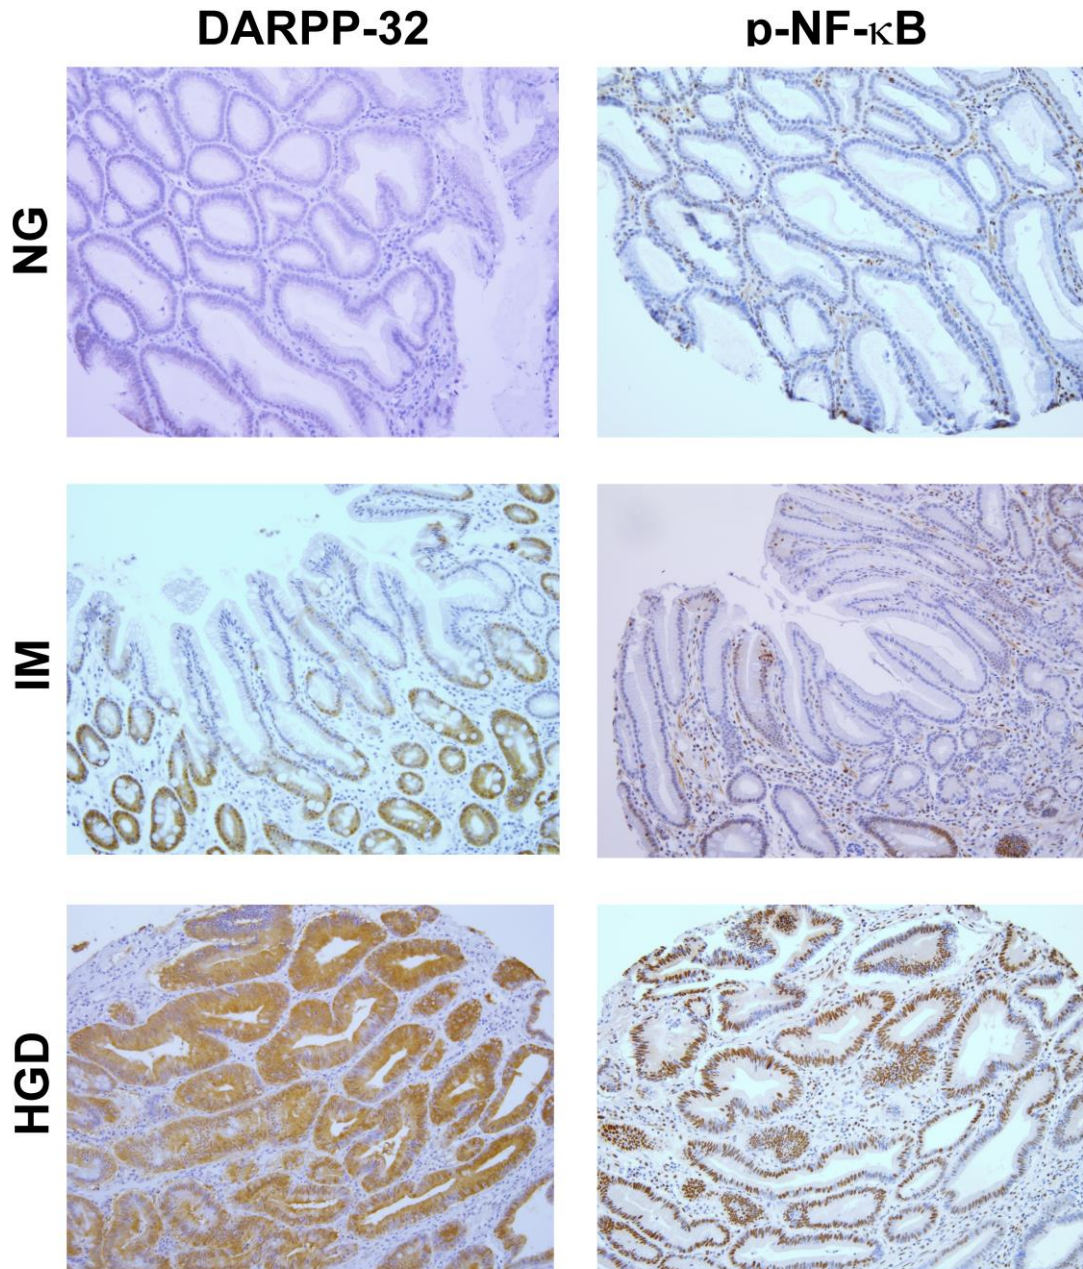

A) Immunohistochemical staining of DARPP-32 and NF- $\kappa$ B in serial tissue samples from human gastric mucosa with normal histology (NG), intestinal metaplasia (IM), and high-grade-dysplasia (HGD).

Supplemental figure 05, zhu et al.



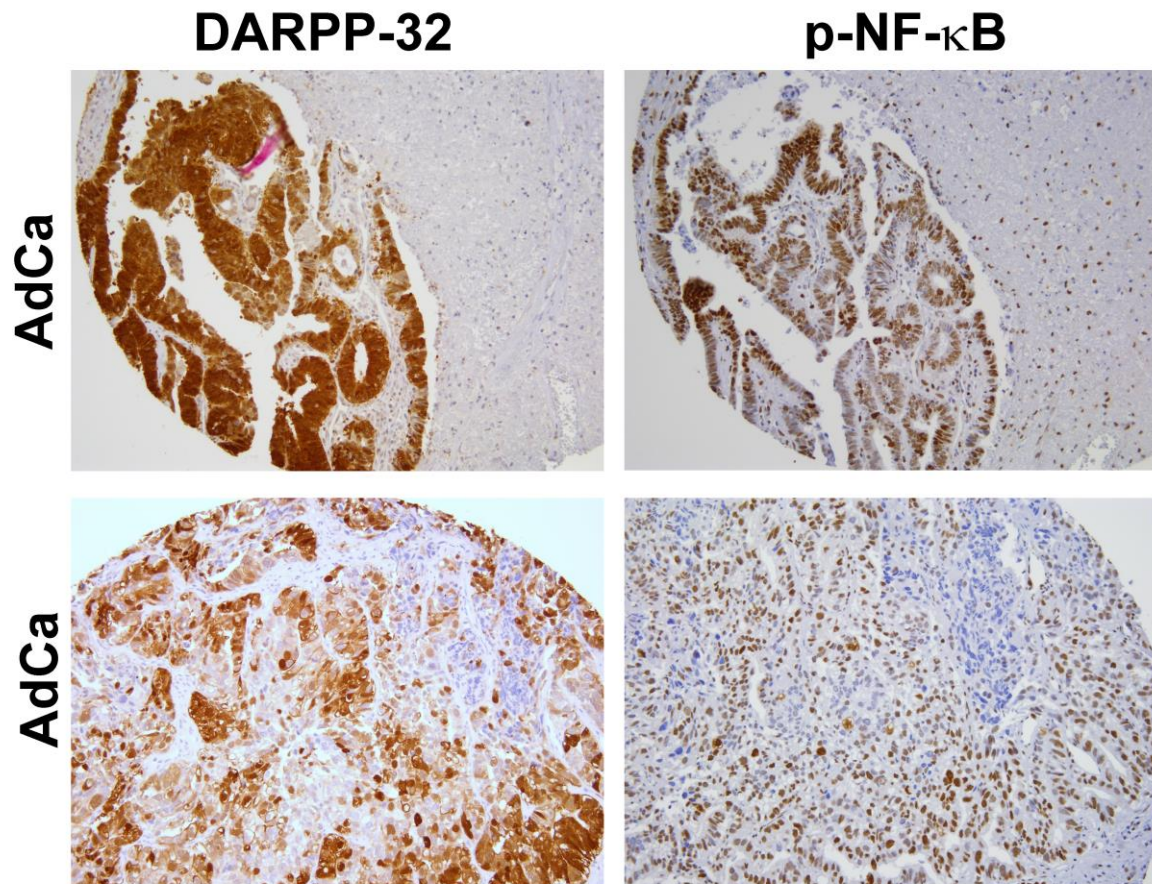

**B) Immunohistochemical staining of DARPP-32 and NF- $\kappa$ B in serial tissue sections from human gastric mucosa showing intestinal-type (upper panels) and diffuse-type (lower panels) adenocarcinomas.**

Supplemental figure 05, zhu et al.
